# Supplementary material for: Construction of an Ordered Transposon Library for Uropathogenic Proteus mirabilis HI4320
Source: PubMed Central journal article supplement (PMC9769666; doi:10.1128/spectrum.03142-22), 2022-11-15
Supplement: spectrum.03142-22-s0001.pdf [file spectrum.03142-22-s0001.pdf]

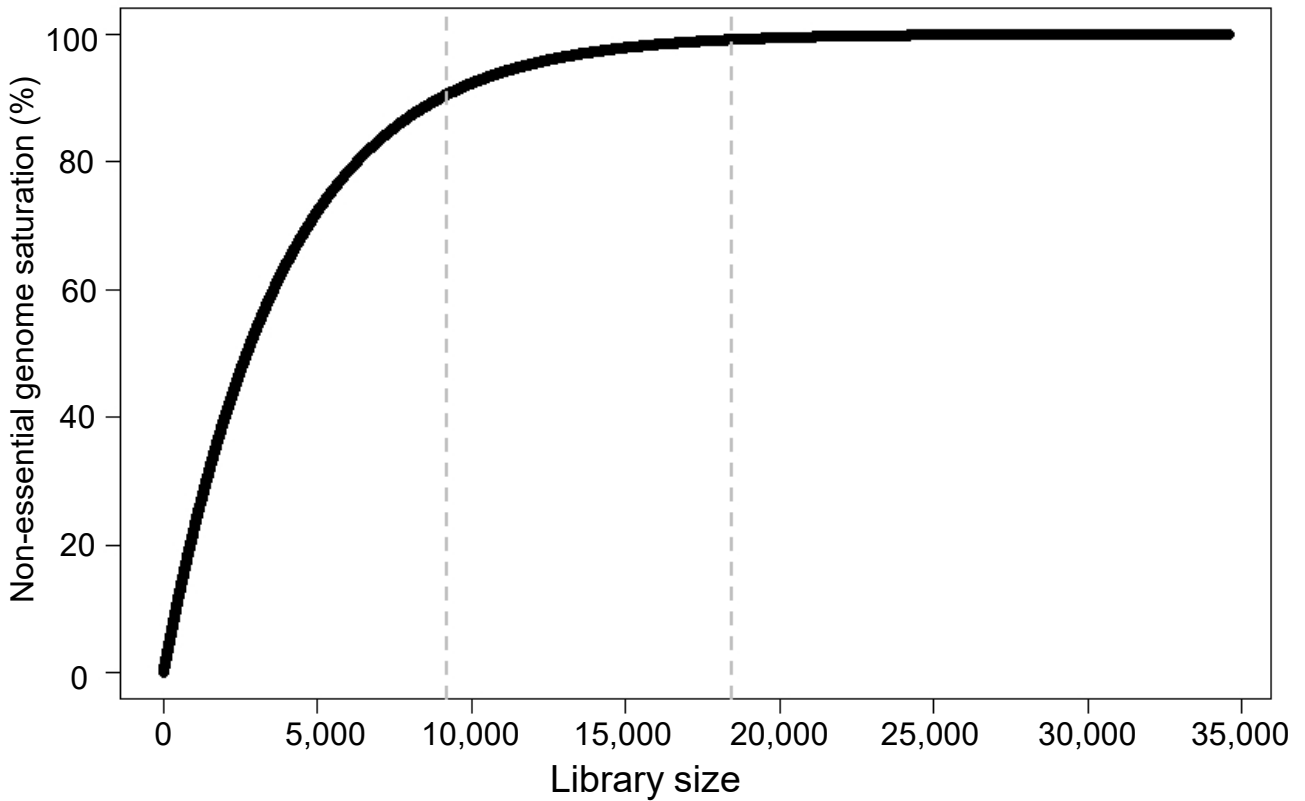

**Supplemental Figure S1. Model of genome saturation.** The ‘coupon collector’s’ problem was used to generate a model of the library size required to generate transposon insertions in simulated non-essential genes. Using this model, one set of 96, 96-well plates containing 9,216 mutants would theoretically achieve 90.6% genome saturation and two sets of plates containing 18,432 mutants would mutate 99.1% of non-essential genome regions. The theoretical saturation for one or two sets of plates is shown as vertical gray dashed lines.

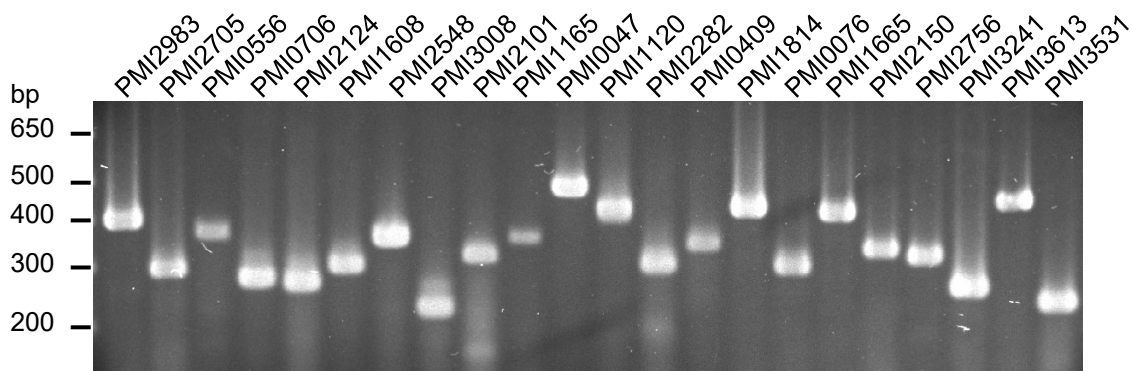

**Supplemental Fig. S2. Validation of transposon position calls by anchored PCR.** PCR was used to confirm transposon insertion in 25 randomly selected mutants using one transposon-specific anchored primer and one gene-specific primer. 22/25 mutants were confirmed to have a transposon in the predicted location (not shown: the three PCR-negative mutants). Size markers shown on left.

**A** Swarm passage #1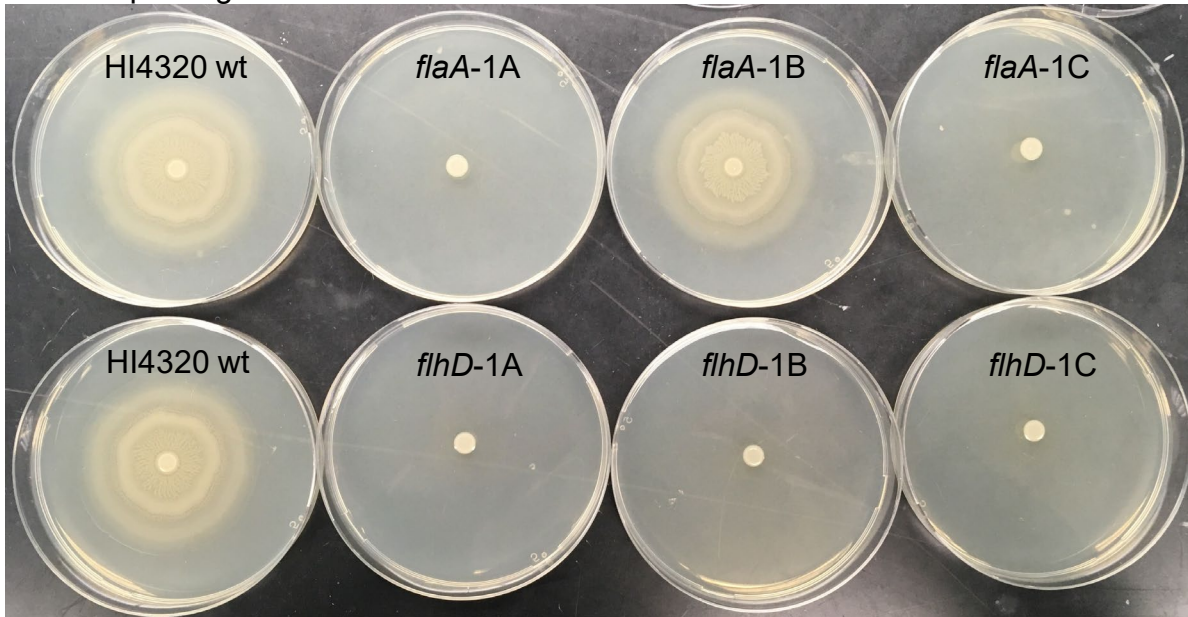**B** *flaA* “original” spread plate (swarm agar)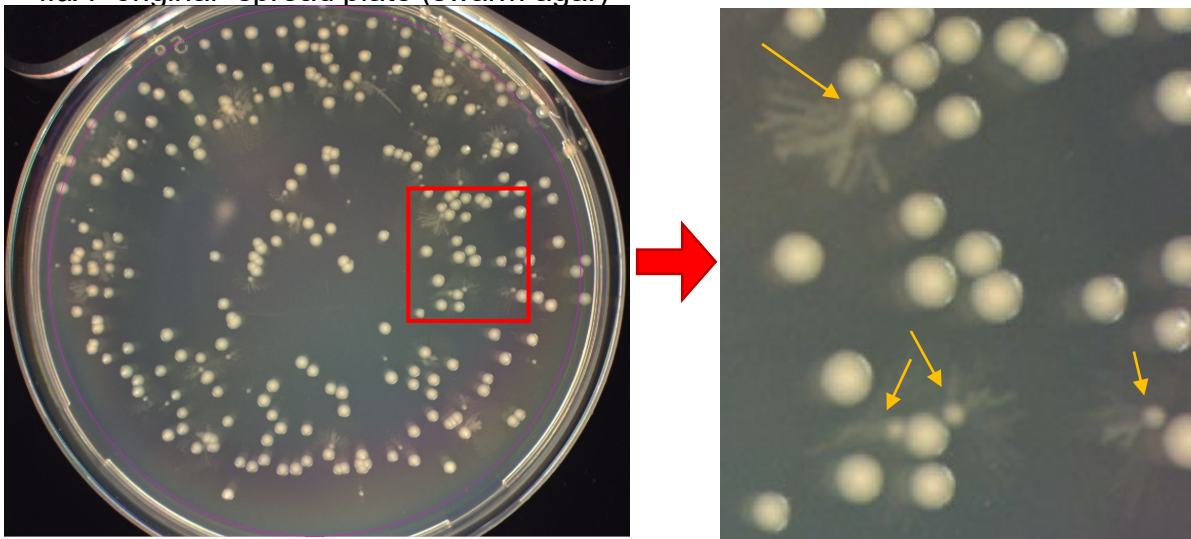

**Supplemental Fig. S3. Swarming motility by *flhD* and *flaA* mutants.** (A) Ordered library mutants predicted to contain transposon insertions in flagellar genes *flhD* or *flaA* were passaged both in broth and on agar and observed for restoration of swarming motility. The *flhD* mutant remained nonmotile throughout the duration of the experiment; the first passage of three colonies is shown here. Passage of the *flaA* mutant resulted in both motile (*flaA*-1B) and nonmotile variants (*flaA*-1A and 1C). Motile isolates, such as *flaA*-1B, showed two transposon insertions on Southern blots (Fig. 3, lane 4). Nonmotile isolates, such as *flaA*-1A, showed a single transposon insertion (Fig. 3, lane 3). (B) Following the observation of motile “*flaA*” derivatives, the primary streak of the “*flaA*” well contents was cultured and dilution-plated to obtain single colonies on swarm agar, resulting in a mixture of swarming and non-swarming colonies. Notably, the swarming colonies, denoted with orange arrows in the inset image, appeared smaller than the nonmotile colonies in this assay. A non-swarming colony was cultured to generate the sample in Fig. 3, lane 5 (one band). A swarming colony was similarly cultured to generate the sample in Fig. 3, lane 6 (two bands).
